# Supplementary material for: Transcriptome-Wide Detection of Differentially Expressed Coding and Non-Coding Transcripts and Their Clinical Significance in Prostate Cancer
Source: PubMed Central journal article supplement (PMC3431106; doi:10.1155/2012/541353), 2012-08-16

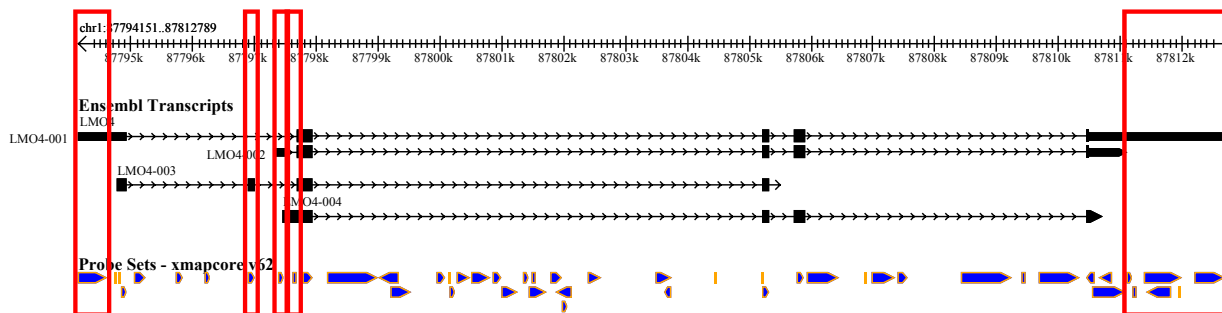

Supplement: 541353.f2.pdf [file 541353.f2.pdf]
